# Supplementary material for: An interfacial toughening strategy for high stability 2D/3D perovskite X-ray detectors with a carbon nanotube thin film electrode
Source: Royal Society of Chemistry journal article supplement (doi:10.1039/d3nr02801a), 2023-01-01
Supplement: d3nr02801a1.pdf [file d3nr02801a1.pdf]

## Interfacial toughening strategy for high stability 2D/3D perovskite X-ray detectors with carbon nanotube thin film electrode

Liwen Qiu<sup>1</sup>, Mingqiang Wang<sup>1</sup>, Tian Sun<sup>1</sup>, Qiang Lou<sup>1</sup>, Tong Chen<sup>1</sup>, Guoshen Yang<sup>1</sup>, Wei Qian<sup>2</sup>, Zixuan Zhang<sup>1</sup>, Shihe Yang<sup>2</sup>, Min Zhang<sup>1</sup>, Yufeng Jin<sup>1</sup>, Hang Zhou<sup>1,\*</sup>

<sup>1</sup>Guangdong Technology Center for Oxide Semiconductor Devices and IC, School of Electronic and Computer Engineering, Peking University Shenzhen Graduate School, Shenzhen, China

<sup>2</sup>Guangdong Provincial Key Lab of Nano-Micro Materials Research, School of Chemical Biology and Biotechnology, Shenzhen Graduate School, Peking University, 518055 Shenzhen, China

\*Author to whom correspondence should be addressed: zhouh81@pkusz.edu.cn

**Keywords:** CNT cloth, 2D/3D perovskite single crystals, direct X-ray detection, TFT integration, reduced dark current

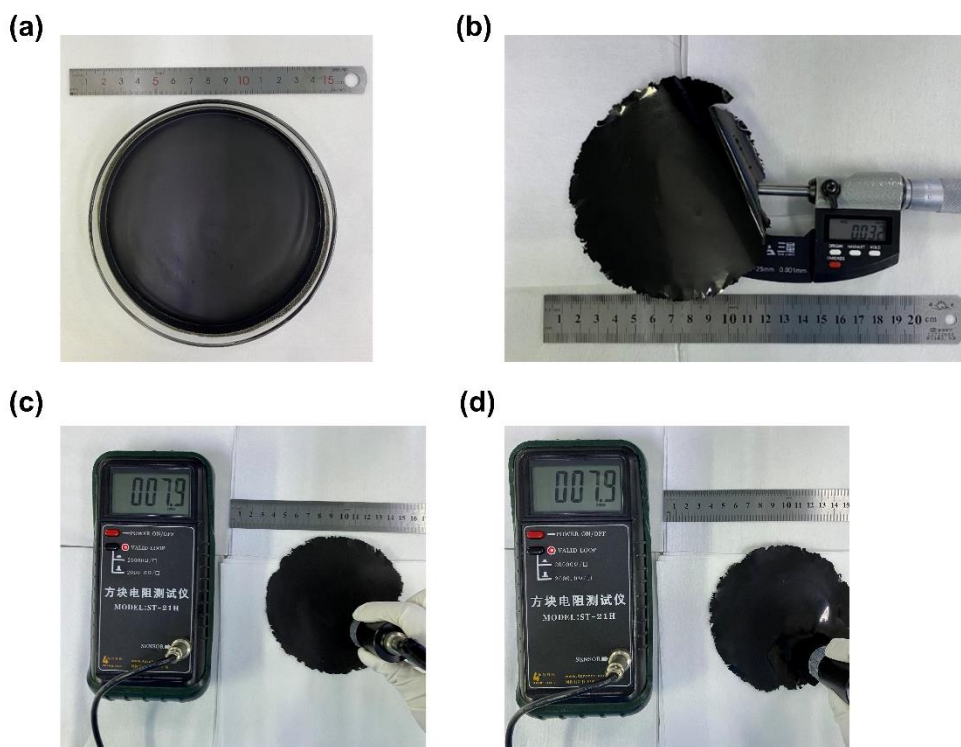

**Figure S1.** The photographs of the as-prepared CNT-film (a), the thickness of the prepared CNT-film measured by micrometer (b), the sheet resistance of rough surface (c) and the reflective surface (d) of the prepared CNT-film measured by the four-probe measurement.

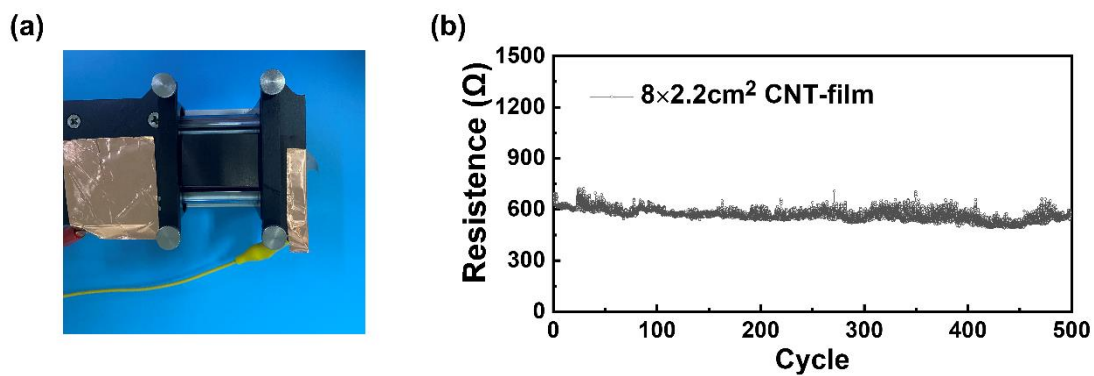

**Figure S2** (a) The photograph of the post-compression CNT-film; (b) Real-time resistance values of CNT-film in a sustaining flexibility examine (0.5Hz, compressing 75% length).

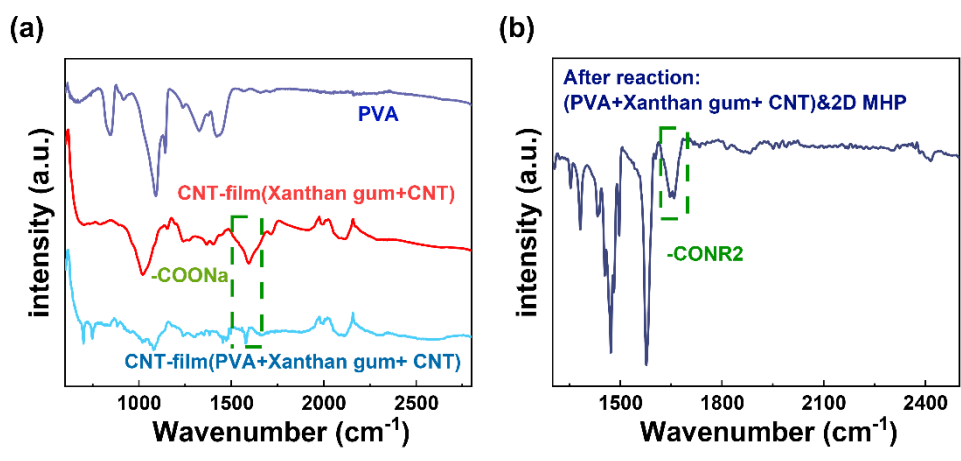

**Figure S3** FTIRs of (a) CNT-film and (b) sample after wet-fusing.

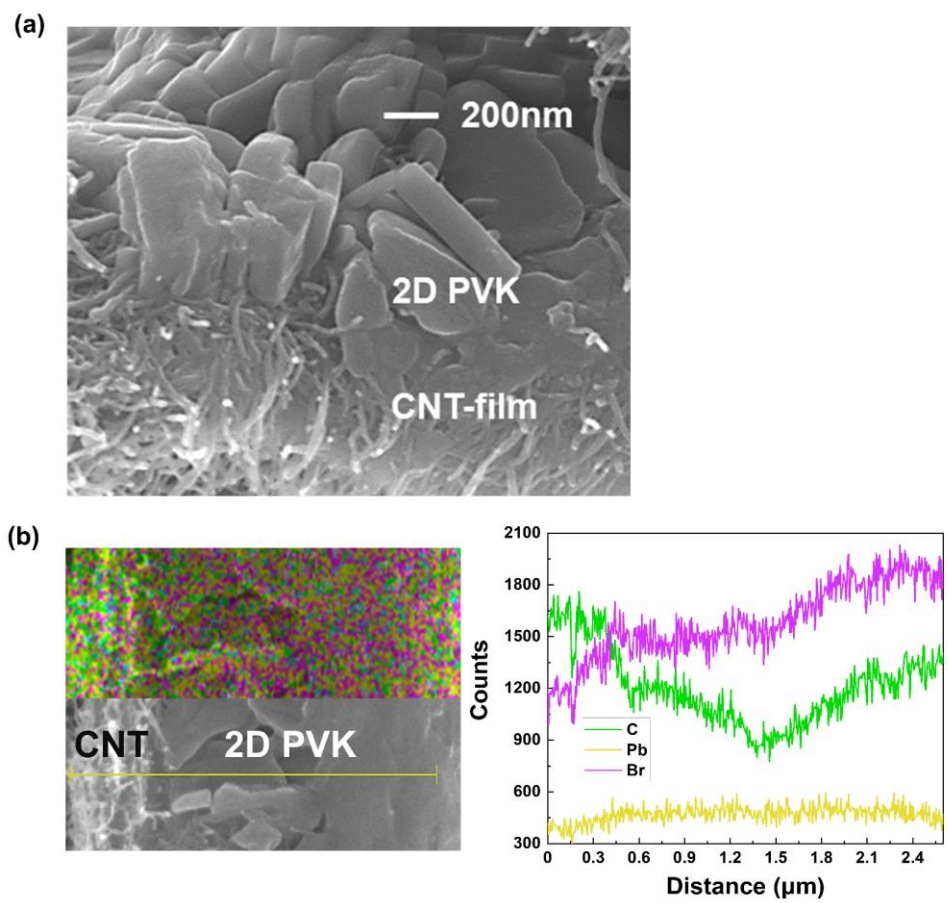

**Figure S4** (a) The SEM appearance of 2D MHP growing on CNT-film. (b) Elemental analysis by EDX of the CNT/2D MHP interface showing clearly the engulfed, overlapping region between the CNTs and the perovskite.

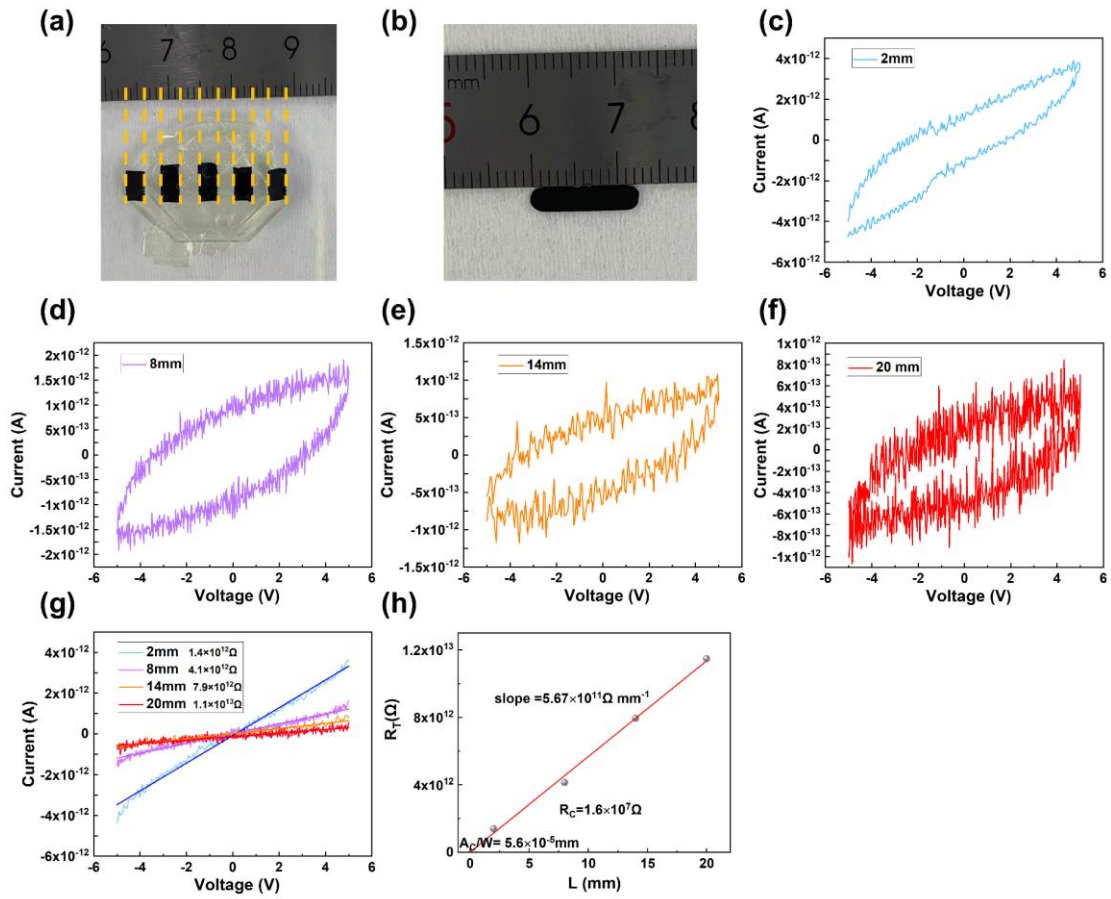

**Figure S5** The photographs of (a) CNT-film wet-fusing on 2D MHPSC featuring the transfer length method (TLM) structure and (b) uniform-shape CNT-film. I-V curves of 2D MHPSC with CNT-film contact for different examining length: 2mm (c), 8mm (d), 14mm (e) and 20mm (f). (g) I-V curves of 2D MHPSC with CNT-film contact after averaging the forward sweep and reverse sweep values. (h) Determining  $\rho$  and  $\rho_c$  of 2D MHPSC with CNT-film contact by the TLM.

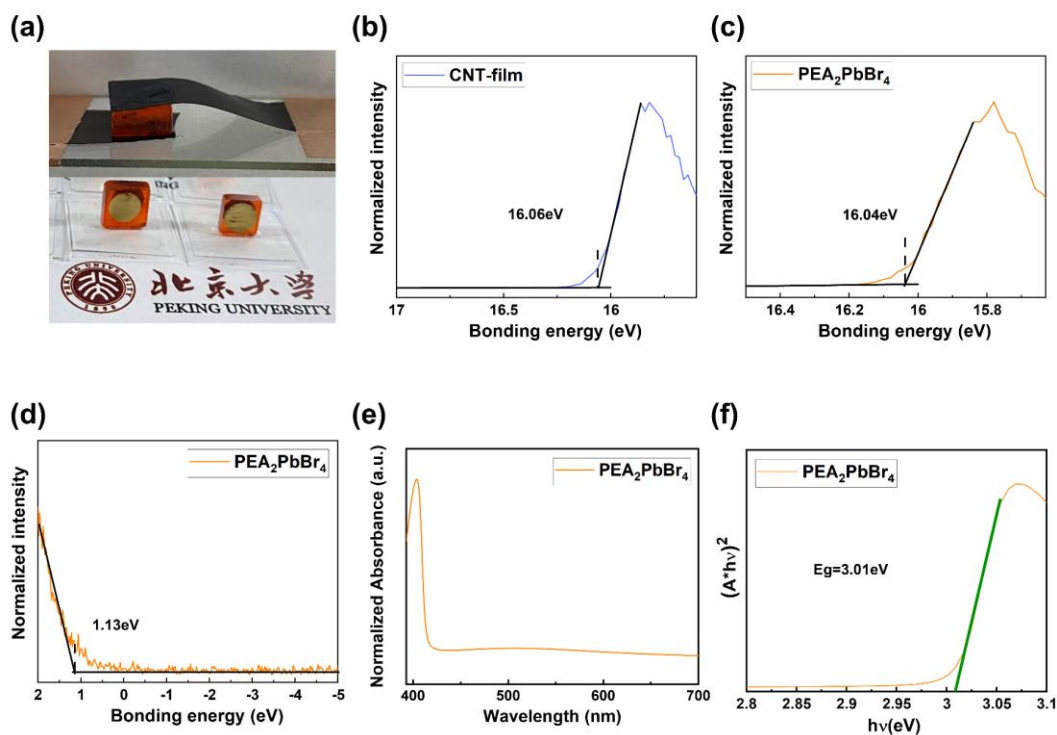

**Figure S6** (a) The photographs of the prepared CNT-film/2D/3D/2D MHP/CNT-film and Au/3D/Au vertical-structure detectors. The UPS measurement results of (b) CNT-film and (c-d) 2D MHPSC. (e) Absorption spectrum of 2D MHPSC. (f) UV-vis-NIR absorption spectrum of 2D MHPSC.

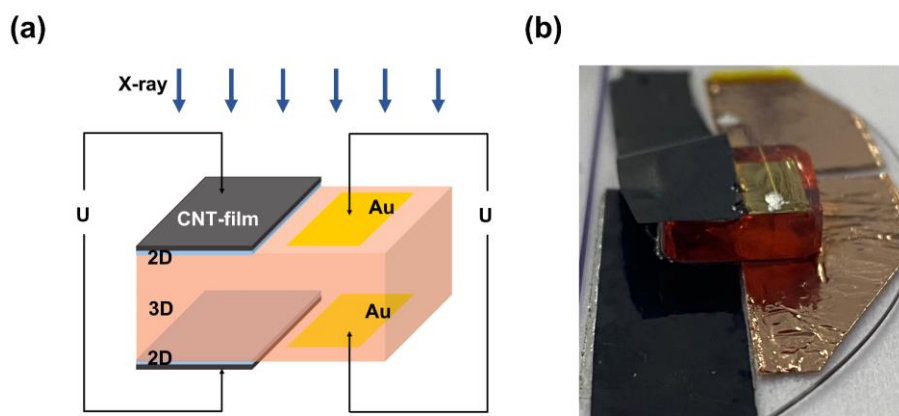

**Figure S7** Schematic illustration (a) and photograph (b) of the two MSM structures, CNT-film/3D/CNT-film and Au/3D/Au, on one 5mm thick 3D MHP.

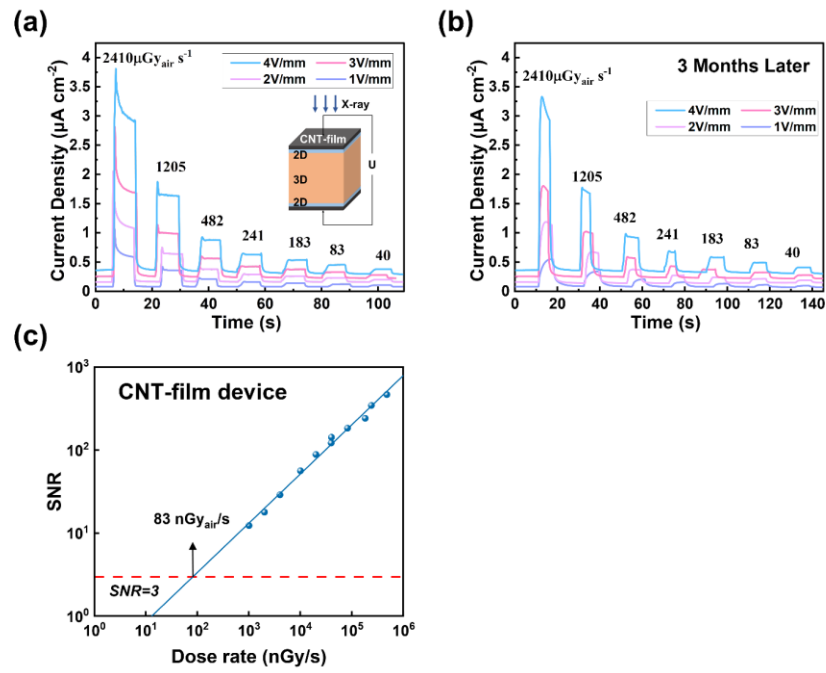

**Figure S8** The J-t X-ray response current densities at different applied electric fields for a CNT-film X-ray detector (a) and for the same device after 3 months of aging (b). (c) Dose rate dependent SNR of CNT-film X-ray detector (electric field of  $4 \text{ V mm}^{-1}$ ).
